# Supplementary material for: Integrative Multi-Kinase Approach for the Identification of Potent Antiplasmodial Hits
Source: Front Chem. 2019 Nov 21;7:773. doi: 10.3389/fchem.2019.00773 (PMC6881481; doi:10.3389/fchem.2019.00773)
Supplement: Supplementary file 1 [file Data_Sheet_1.docx]

Supplementary Material

Integrative Multi-kinase Approach for the Identification of Potent Antiplasmodial Hits

Marilia N. N. Lima1, Gustavo C. Cassiano2, Kaira C. P. Tomaz2, Arthur C. Silva1, Bruna K. P. Sousa1, Leticia T. Ferreira2, Tatyana A. Tavella2, Juliana Calit3, Daniel Y. Bargieri3, Bruno J. Neves4, Fabio T.M. Costa2, Carolina Horta Andrade1,2*

1LabMol – Laboratory for Molecular Modeling and Drug Design, Faculty of Pharmacy, Federal University of Goiás, Goiânia, Brazil

2Laboratory of Tropical Diseases – Prof. Dr. Luiz Jacintho da Silva, Department of Genetics, Evolution, Microbiology and Immunology, Institute of Biology, UNICAMP, Campinas, Brazil

3Department of Parasitology, Institute of Biomedical Sciences, University of São Paulo, São Paulo, Brazil

4Laboratory of Cheminformatics, University Center of Anápolis/UniEVANGELICA, Anápolis, Brazil

*** Correspondence:**Carolina Horta Andrade
carolina@ufg.br

# Supplementary tables

**Table S1.** Selected inhibitors to generate the shape-based models

| **Kinase** | **Template Structure** | **Template Shape** |
| --- | --- | --- |
| CDPK1 |   IC50 = 0.007 µM  SID 307078537  Template I* | 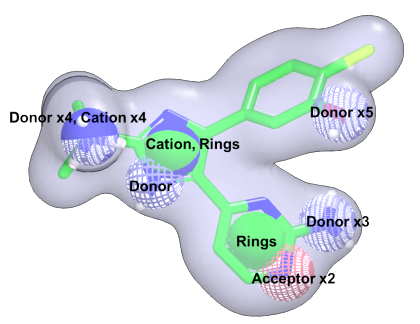 |
| CDPK1 |   IC50 = 0.015 µM  SID 307073749  Template II | 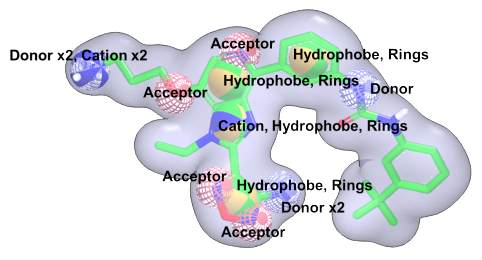 |
| CDPK1 |   IC50 = 0.094 µM  SID 307076176  Template III | 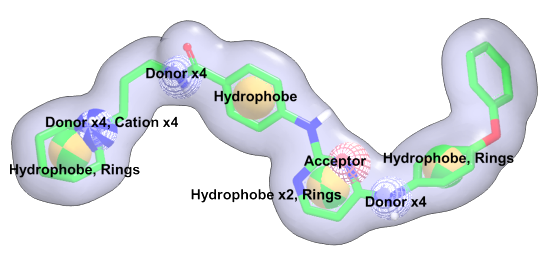 |
| CDPK4 |   IC50 = 0.021µM  SID 307068815  Template IV* | 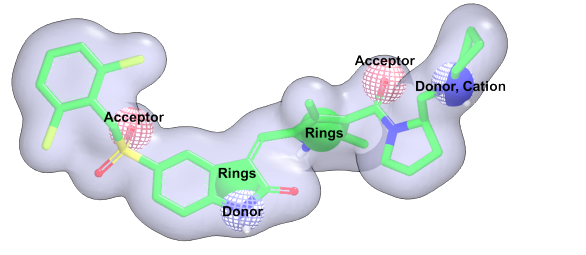 |
| CDPK4 |   IC50 = 0.021µM  SID 307068815  Template V | 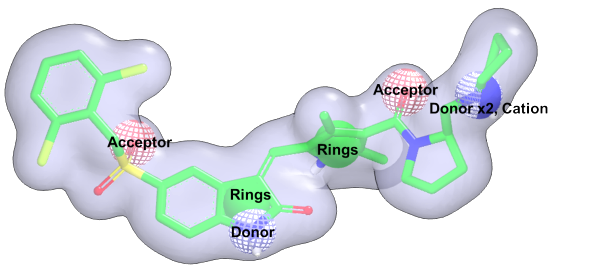 |
| CDPK4 |   IC50 = 0.021µM  SID 307068815  Template VI | 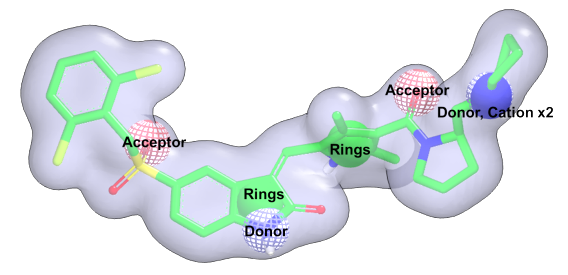 |
| PK6 |   IC50 = 0.042µM  SID 307071719  Template VII* | 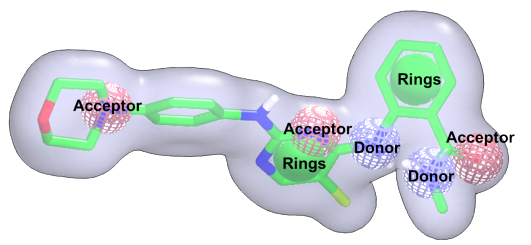 |
| PK6 |   IC50 = 0.042µM  SID 307071719  Template VIII | 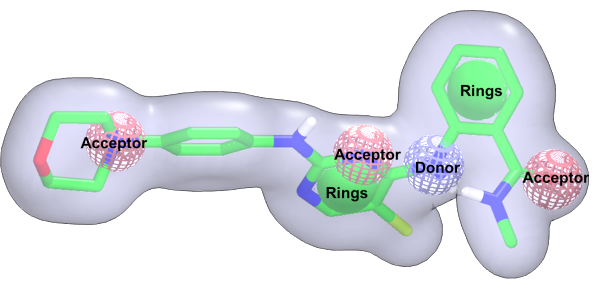 |
| PK6 |   IC50 = 0.042µM  SID 307071719  Template XI | 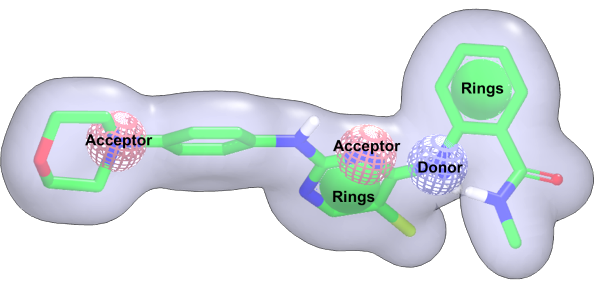 |

*Selected template.

**Table S2.** Summarized statistical characteristics of phenotypic ML models after Y-Randomization test.

| **Model** | **CCR** | **SE** | **SP** | **PPV** | **NPV** | **Coverage** |
| --- | --- | --- | --- | --- | --- | --- |
| ***P. falciparum* 3D7 strain** | | | | | | |
| Avalon | 0.51 | 0.50 | 0.51 | 0.50 | 0.52 | 1 |
| MACCS | 0.49 | 0.50 | 0.48 | 0.49 | 0.49 | 1 |
| Morgan | 0.49 | 0.46 | 0.52 | 0.49 | 0.48 | 1 |
| FeatMorgan | 0.50 | 0.50 | 0.50 | 0.50 | 0.51 | 1 |
| AtomPair | 0.51 | 0.50 | 0.53 | 0.51 | 0.51 | 1 |
| ***P. falciparum* W2 strain** | | | | | | |
| Avalon | 0.51 | 0.50 | 0.51 | 0.51 | 0.51 | 1 |
| MACCS | 0.49 | 0.51 | 0.47 | 0.49 | 0.49 | 1 |
| Morgan | 0.50 | 0.47 | 0.54 | 0.51 | 0.50 | 1 |
| FeatMorgan | 0.49 | 0.49 | 0.48 | 0.48 | 0.49 | 1 |
| AtomPair | 0.51 | 0.46 | 0.55 | 0.51 | 0.50 | 1 |

CCR: Correct Classification Rate; SE: Sensitivity; SP: Specificity; PPV: Positive Predictive Value; NPV: Negative Predictive Value; AD: Applicability Domain

**Table S3.**  Docking coordinates and validation metrics of homology modeling obtained using MolProbity webserver.

| Kinase | Template | Docking Coordinates | Validation Metrics - MolProbity | | | | | |
| --- | --- | --- | --- | --- | --- | --- | --- | --- |
| Clash Score | Poor rotamers | Favored rotamers | Ramachandran outliers | Ramachandran favored | MolProbity Score |
| CDPK1 | 3T3U | 19.24Å x 16.06Å x 63.58Å | 7.1 | 0.00% | 99.30% | 0.21% | 98.30% | 1.39 |
| CDPK4 | - | 31.10Å x -12.94Å x -0.14Å | - | - | - | - | - | - |
| PK6 | 3EZV | 0.70Å x 28.60Å x 9.53Å | 6.77 | 1.47% | 96.70% | 0.34% | 97.25% | 1.64 |

*For CDPK4 had used 4QOX crystal structure
